# Supplementary material
Source: PubMed Central journal article supplement (PMC3442576)
Supplement: supp_tpc.112.097139_tpc097139Supplemental.pdf [file supp_tpc.112.097139_tpc097139Supplemental.pdf]

## Supplemental Fig. 1

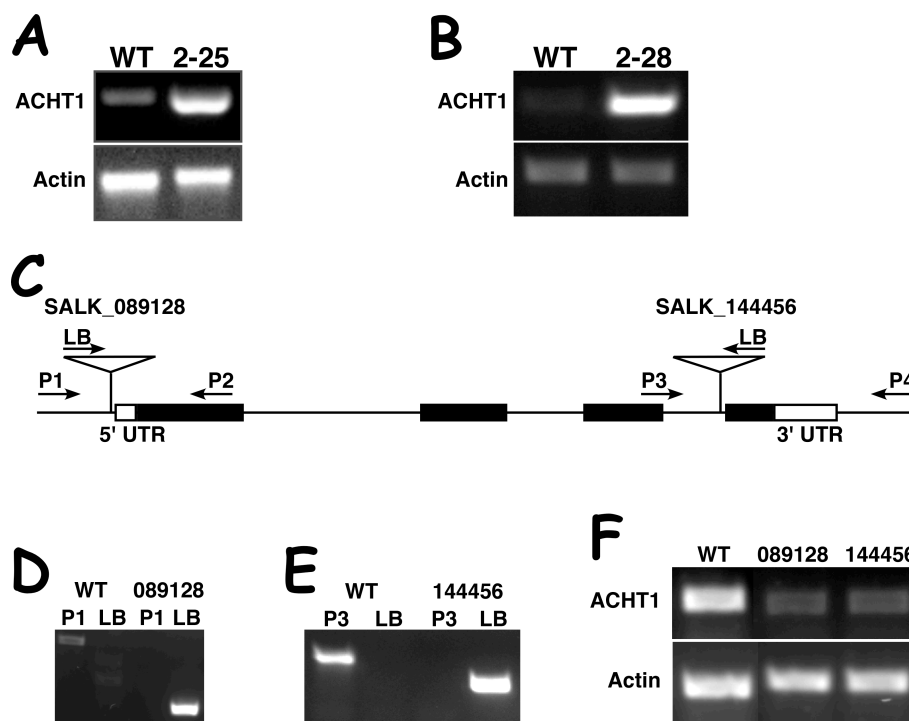

**Characterization of plant lines with altered expression of ACHT1.** **A.** ACHT1 expression is increased in transgenic plants expressing HA-tagged ACHT1 under the control of the 35S promoter. Total RNA was extracted from wild-type (WT) or transgenic (2-25) plants and was reverse transcribed into cDNA. PCR analysis of the cDNA using ACHT1-specific primers (forward primer, GCCAAACATGATTGACATTACCTCA; reverse primer, CTCAGTTTCTGGAAGTGGCAAGAGAGCAT) showed elevated amounts of ACHT1 transcript in the transgenic line. Actin was used as an internal control. Both ACHT1 and actin were amplified for 26 cycles. **B.** PCR analysis of a second independent transgenic line (2-28) showed similar results, demonstrating accumulation of elevated amounts of ACHT1 transcript relative to wild-type plants. **C.** The structure of *ACHT1*, showing the locations of the T-DNA insertions in the two lines used for phenotypic analysis, and the primers used for their PCR analysis. Black boxes, exons; white boxes, UTRs; lines, introns. Homozygous mutant plants were identified by genomic PCR using gene-specific primers P2 and either gene-specific primer P2 or the T-DNA left border primer, LBb1

(LB), to analyze the T-DNA insertion in the SALK\_089128 line **(D)** and gene-specific primers P4 and either gene-specific primer P3 or the T-DNA left border primer, LBb1 (LB), to analyze the T-DNA insertion in the SALK\_144456 line **(E)**. The gene-specific primers amplified a product in the wild-type plants (WT), but the T-DNA insertion in homozygous mutant lines prevented PCR amplification with the gene-specific primers. PCR product was produced only when the T-DNA-specific primer was used. The position of the T-DNA insertion was determined by sequencing the PCR product obtained with either the P2 or P4 primers and the LBb1 primer and found to map at position 13255134 of chromosome 4 for the SALK\_089128 insertion line, and position 13256518 of chromosome 4 for the SALK\_144456 insertion line. **F.** ACHT1 expression is decreased in the T-DNA insertion mutant lines. Total RNA was extracted from WT plants or T-DNA insertion lines and was reverse transcribed into cDNA. PCR analysis of the cDNA using ACHT1 specific primers demonstrated a decrease in ACHT1 transcript in the T-DNA insertion lines. Actin was used as an internal control. Both ACHT1 and actin were amplified for 26 cycles. The results shown are representative of three independent experiments.

**Supplementary Fig. 2**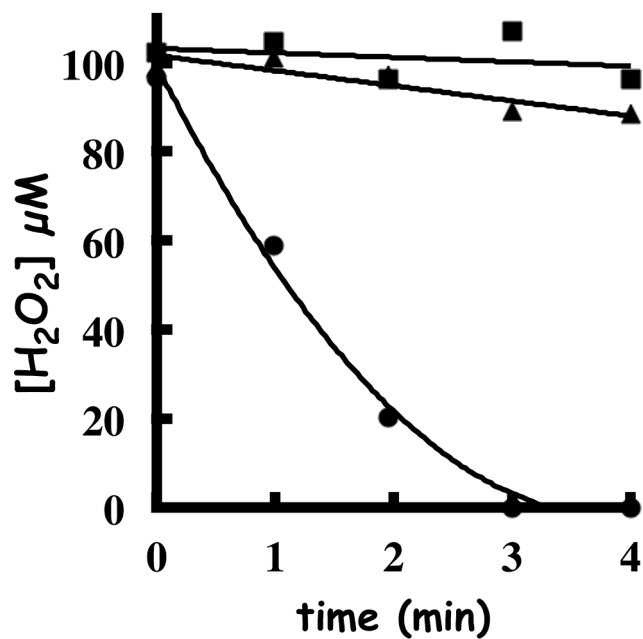

**ACHT1 requires 2-cys Prx for peroxide reduction.** The recombinant leaderless form of ACHT1 (2.5  $\mu\text{M}$ ) was incubated with  $\text{H}_2\text{O}_2$  (100  $\mu\text{M}$ ) in the presence (circles) or absence (rectangles) of recombinant 2-Cys PrxA (5  $\mu\text{M}$ ). 2-Cys PrxA alone (triangles) was used as a control. The reaction was performed in the presence of 0.4 mM DTT, and the concentration of  $\text{H}_2\text{O}_2$  was determined at different time points using the Peroxoquant reagent (Pierce).

### Supplementary Fig. 3

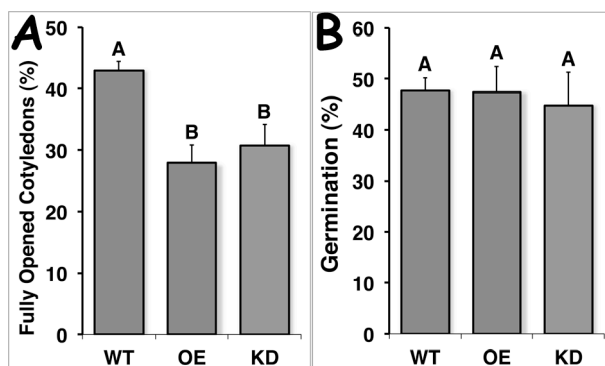

**Growth phenotype of plants with altered ACHT1 expression. A. Growth rate.** ~ Fifty Seedlings of wild-type (WT), ACHT1 overexpressor (OE) and ACHT1 knock down (KD) plants were scored at 66 h post-stratification, and the percentage of plantlets with fully opened cotyledons was calculated. **B. Germination rate.** ~ Fifty seedlings of WT, OE and KD lines were scored at 24 h post-stratification, and the percentage of germination (determined by radicle emergence) was calculated.

Data represent mean and SE (n=12 for developmental scoring and n=8 for germination assays). Different letters on the bars represent means that are statistically different relative to WT plants based on the Tukey-Kramer HSD test using a *P*-value cutoff of 0.05.

Plants were grown at 20<sup>0</sup>C/18<sup>0</sup>C under 8/16 h light/dark cycle, using fluorescent white light at ~120 μE/m<sup>2</sup>s. Results from two knock down lines (SALK\_089128 and SALK\_144456) were pooled together as well as the results from two over-expresser lines (2-25 and 2-28). The different lines are characterized in Supplemental Fig. 1 online.

## Supplemental Table 1

**Table 1: 2-Cys Prx peptides identified by MS/MS in immunopurified ACHT1 complexes.**

| Peptide sequence                               | Mass     | Charge |
|------------------------------------------------|----------|--------|
| LSDYIGKK <sup>1</sup>                          | 923.5198 | 2      |
| SFGVLIHDQGIALR <sup>1</sup>                    | 1525.849 | 3      |
| LSKEYFSAI <sup>1,2</sup>                       | 1057.557 | 3      |
| APDFEAEAVFDQEFIK <sup>1,2</sup>                | 1855.875 | 2      |
| AQADDLPLVGNK <sup>1,2</sup>                    | 1240.653 | 2      |
| KSGGLGDLNYPLISDVTK <sup>1</sup>                | 1877.002 | 2      |
| GLFIIDKEGVIQHSTINNLGIGR <sup>1,2</sup>         | 2494.378 | 3      |
| SGGLGDLNYPLISDVTK <sup>1</sup>                 | 1748.907 | 2      |
| APDFEAEAVFDQEFIK <sup>1,2</sup>                | 1855.875 | 2      |
| TLQALQYIQENPDEVC(+57.02)PAGWKPGEK <sup>1</sup> | 2871.397 | 3      |
| AQADDLPLVGNKAPDFEAEAVFDQEFIK <sup>1,2</sup>    | 3077.51  | 3      |
| SFGVLIPDQGIALR <sup>2</sup>                    | 1485.843 | 2      |
| TLQALQYVQENPDEVC(+57.02)PAGWKPGEK <sup>2</sup> | 2857.381 | 3      |

<sup>1</sup>Peptide sequence found in 2-Cys PrxA

<sup>2</sup>Peptide sequence found in 2-Cys PrxB
